## RESEARCH ARTICLE

# Effects of virtual reality rehabilitation training on gait and balance in patients with Parkinson's disease: A systematic review

Cheng Lei<sup>1</sup>, Kejimu Sunzi<sup>1</sup>, Fengling Dai<sup>2,3</sup>, Xiaoqin Liu<sup>1</sup>, Yanfen Wang<sup>1</sup>, Baolu Zhang<sup>2</sup>, Lin He<sup>1</sup>, Mei Ju<sup>2\*</sup>

**1** Department of Nursing, People's Hospital of Deyang, Deyang, Sichuan, China, **2** School of Nursing, Southwest Medical University, Luzhou, Sichuan, China, **3** Faculty of Nursing, Chiang Mai University, Chiang Mai, Thailand

\* [emergency\\_0405@163.com](mailto:emergency_0405@163.com)

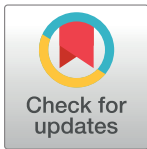

## Abstract

### Objective

In recent years, virtual reality (VR) has been tested as a therapeutic tool in neurorehabilitation research. However, the impact effectiveness of VR technology on for Parkinson's Disease (PD) patients is still remains controversial unclear. In order to provide a more scientific basis for rehabilitation of PD patients' modality, we conducted a systematic review of VR rehabilitation training for PD patients and focused on the improvement of gait and balance.

### Methods

An comprehensive search was conducted using the following databases: PubMed, Web of Science, Cochrane Library, CINHALL, Embase and CNKI (China National Knowledge Infrastructure). Articles published before 30 December 2018 and of a randomized controlled trial design to study the effects of VR for patients with PD were included. The study data were pooled and a meta-analysis was completed. This systematic review was conducted in accordance with the PRISMA guideline statement and was registered in the PROSPERO database (CRD42018110264).

### Results

A total of sixteen articles involving 555 participants with PD were included in our analysis. VR rehabilitation training performed better than conventional or traditional rehabilitation training in three aspects: step and stride length (SMD = 0.72, 95%CI = 0.40,1.04, Z = 4.38, P<0.01), balance function (SMD = 0.22, 95%CI = 0.01,0.42, Z = 2.09, P = 0.037), and mobility (MD = -1.95, 95%CI = -2.81,-1.08, Z = 4.41, P<0.01). There was no effect on the dynamic gait index (SMD = -0.15, 95%CI = -0.50,0.19, Z = 0.86, P = 0.387), and gait speed (SMD = 0.19, 95%CI = -0.03,0.40, Z = 1.71, P = 0.088).As for the secondary outcomes, compared with the control group, VR rehabilitation training demonstrated more significant effects on the improvement of quality of life (SMD = -0.47, 95%CI = -0.73,-0.22, Z = 3.64, P<0.01), level of confidence (SMD = -0.73, 95%CI = -1.43,-0.03, Z = 2.05, P = 0.040), and

## OPEN ACCESS

**Citation:** Lei C, Sunzi K, Dai F, Liu X, Wang Y, Zhang B, et al. (2019) Effects of virtual reality rehabilitation training on gait and balance in patients with Parkinson's disease: A systematic review. PLoS ONE 14(11): e0224819. <https://doi.org/10.1371/journal.pone.0224819>

**Editor:** Imre Cikajlo, University rehabilitation institute, SLOVENIA

**Received:** April 15, 2019

**Accepted:** October 22, 2019

**Published:** November 7, 2019

**Copyright:** © 2019 Lei et al. This is an open access article distributed under the terms of the [Creative Commons Attribution License](https://creativecommons.org/licenses/by/4.0/), which permits unrestricted use, distribution, and reproduction in any medium, provided the original author and source are credited.

**Data Availability Statement:** All relevant data are within the manuscript and its Supporting Information files.

**Funding:** This work is supported by the Science and Technology Project of Sichuan Health Commission(18PJ331). The funders had no role in study design, data collection and analysis, decision to publish, or preparation of the manuscript.

**Competing interests:** The authors have declared that no competing interests exist.

neuropsychiatric symptoms (SMD = -0.96, 95%CI = -1.27,-0.65, Z = 6.07, P<0.01), while it may have similar effects on global motor function (SMD = -0.50, 95%CI = -1.48,0.48, Z = 0.99, P = 0.32), activities of daily living (SMD = 0.25, 95%CI = -0.14,0.64, Z = 1.24, P = 0.216), and cognitive function (SMD = 0.21, 95%CI = -0.28,0.69, Z = 0.84, P = 0.399). During the included interventions, four patients developed mild dizziness and one patient developed severe dizziness and vomiting.

## Conclusions

According to the results of this study, we found that VR rehabilitation training can not only achieve the same effect as conventional rehabilitation training. Moreover, it has better performance on gait and balance in patients with PD. Taken together, when the effect of traditional rehabilitation training on gait and balance of PD patients is not good enough, we believe that VR rehabilitation training can at least be used as an alternative therapy. More rigorous design of large-sample, multicenter randomized controlled trials are needed to provide a stronger evidence-based basis for verifying its potential advantages.

## Introduction

Parkinson's disease (PD) is a common neurodegenerative disease with progressive development [1]. The pathological changes of the disease are degeneration of the substantia nigra and striatum pathway [2]. In general, the incidence of PD in people before the age of 60 is 0.13% to 1.6%, but with the increase of age, the incidence of PD in people aged 80 to 84 can be as high as 9% [3]. The clinical manifestations are motor symptoms such as bradykinesia, dystonia, tremor and postural balance disorder, and non-motor symptoms such as cognitive decline and depression [4]. Currently, drug therapy is the preferred treatment for PD, but it is effective only for the first years after onset and some symptoms do not respond at all to drug treatment [5, 6]. Deep brain stimulation is one of the current treatments for primary PD where electrodes are implanted in the brain to stimulate the targeted area and improve the related symptoms of PD patients. However, improper intraoperative electrode positioning or stimulation parameters may not only affect the therapeutic effect, but also stimulate the peripheral nerve conduction bundle, causing various types of motor, sensory symptoms and other adverse reactions [7]. It has been reported that long-term rehabilitation training can improve the motor ability and cognitive outcome of patients with PD [8, 9]. However, in actual clinical practice, long-term rehabilitation training has high requirements for the ability of rehabilitation therapists, the financial situation of patients, training places, and the safety of patients. As a result, it is difficult for people with PD to obtain and maintain long-term regular training.

In recent years, virtual reality (VR) as a therapeutic tool has become a new topic in neurorehabilitation research [10]. From the perspective of kinematics learning, VR provides a possibility for high-intensity, task-oriented and multi-sensory feedback training, which can promote patients' visual, auditory and tactile input, and increase their interest in the rehabilitation process by letting patients experience immersion or non-immersion virtual environment, so that patients' treatment compliance is effectively improved [11, 12]. Previous studies have confirmed that VR technology plays an active role in stroke [13], cognitive function and quality of life in the elderly [14]. It has also been shown that VR can improve the balance function and daily life activities of patients with PD [15]. However, a systematic review from Cochrane

Library showed that VR rehabilitation training had a positive impact only on stride speed and stride length of patients with PD compared to traditional physical training [16]. The small number of studies and limited sample size for testing of VR rehabilitation training have yielded inconsistent results. Therefore, the impact of VR technology on PD patients is still controversial.

In order to provide a more scientific basis for the rehabilitation of PD patients, we conducted a systematic review and meta-analysis of VR rehabilitation training for PD patients.

## Methods

### Data sources and search strategy

This meta-analysis was executed following the (Preferred Reporting Items for Systematic Reviews and Meta-Analyses) PRISMA guidelines ([S1 Checklist](#)) and was registered in the PROSPERO database (CRD42018110264).

We conducted an electronic search through the following databases: PubMed, Web of Science, Cochrane Library, CINHALL, Embase, and CNKI (China National Knowledge Infrastructure). All databases were searched from the establishment of the database to 30 December 2018. The main terms including "Parkinson's disease," "Parkinsonian," "pd" and "virtual reality," "VR," "kinect," "Wii," "X-box" and their related synonyms were taken into consideration. The detail strategy is presented in [S1 Appendix](#).

### Research question and study selection

Our research question was based following on the PICOS principle (Population, Intervention, Comparison, Outcome measures and Study design). We included studies involving participants who were clinically diagnosed with PD, without any limitations on gender, age, disease duration or severity. The experimental group in each study was treated with exercise and motor rehabilitation training based on VR technology. We define VR intervention as "rehabilitating training based on a computer simulation: users appear in the virtual environment in real time through a variety of sensory modes and interact with images or virtual objects." This includes interactive motion-sensing training or commercial video training games (such as Nintendo Wii Fit, x-box 360, etc.). There were no limits on the frequency or duration of VR rehabilitation training. The control group received routine physical rehabilitation therapy or standard of care such as health education, rehabilitation care, physiotherapist supervised training or any other non-VR exercise intervention. All studies were designed as randomized controlled trials, other methodological designs were excluded.

### Types of outcome measures

The primary outcomes we collected included three aspects: (1) Gait. Dynamic Gait Index (DGI) [17], Six or Ten Minute Walk Test (6MWT or 10MWT) [18, 19] were used to evaluate gait. Gait speed and step and stride length were calculated using the results of scale measurements. (2) Balance function. Measures of balance function were completed with Center of Pressure behavior (CoP) [20], Berg Balance Scale (BBS) [21] and Dynamic Balance Performance (DBP) [22]. (3) Mobility. Timed Up and Go Test (TUGT) [23] were used to measure changes in subjects' mobility.

Our collection of secondary outcomes includes the following: (1) Global motor function. The Unified Parkinson's Disease Rating Scale part III [21] was used to measure global motor function changes. (2) Activities of daily living (ADL). UPDRS part II [21] and the Barthel Index [24] were employed to measure ADL. (3) Quality of life. Quality of life was determined

by the 39-Item Parkinson's Disease Questionnaire (PDQ-39) [17] and the World Health Organization Quality of Life for Older Persons (WHOQOL-OLD) [19]. (4) Perceived confidence in balance. The Falls Efficacy Scale (FES) [25] and Activities-specific Balance Confidence Scale (ABC) [26] were used to measure patient's level of confidence in doing specific activities that could affect balance and cause falls. (5) Neuropsychiatric symptoms. Beck Anxiety Inventory (BAI) [19], Beck Depression Inventory (BDI) [24], 15-item Geriatric Depression Scale (GDS-15) [27], and Hamilton Depression Scale (HAMD) [20] were used to record neuropsychiatric symptoms changes in subjects. (6) Cognitive function. Cognitive function was measured by the Montreal Cognitive Assessment (MCA) [21], Mini-Mental State Examination (MMSE) [26], and Digit Span forward (DSF) [19]. (7) Adverse events. The number and type of adverse events reported in each study were collected.

The outcome measures used in this study were extracted from the included literatures.

### Data extraction and quality assessment (risk of bias)

The titles and abstracts of the retrieved literature, were initially screened by two independent reviewers (L.C and SZ.K), and duplicates were eliminated by Endnote. After that, the full text of the selected study was analyzed to determine whether the study met the inclusion and exclusion criteria. After identifying suitable articles for inclusion in this study, data extraction and quality assessment (risk of bias) were carried out independently by the above evaluators. The extraction contents include research design, research location, inclusion and exclusion criteria, research objects, intervention measures, control measures, outcome index evaluation time and so on. If the data of the study report is incomplete, the original author was contacted to obtain it. If relevant data were not able to be obtained, the study was excluded. Quality assessment was done using Cochrane Handbook for Systematic Reviews of Interventions Version 5.1.0. The criteria included: (1) random sequence generation; (2) allocation concealment; (3) blinding of outcome assessment; (4) incomplete outcome data; (5) selective outcome reporting. Each criterion was judged as "low risk of bias", "high risk of bias" or "unclear risk of bias". Because of the particularity of VR intervention, blind method was not applicable to subjects and therapists, so it was not included in the "risk of bias" assessment. All disagreements were resolved through third researcher (D.FL).

### Data synthesis and meta-analysis

The primary outcomes and secondary outcomes concerned in this paper are continuous variables. If possible, we pooled the change values of each indicator before and after intervention. Mean differences (MD) or standardized mean difference (SMD) and its 95% confidence interval (CI) were the results of meta-analysis. We visually assessed heterogeneity through forest plots and  $I^2$  statistic made funnel plot to judge publication bias. When  $P < 0.05$  or  $I^2 \geq 50\%$ , it was considered that there was substantial heterogeneity, and a random effect model was selected, otherwise a fixed effect model was selected for analysis. For all the result variables, two-tailed  $P < 0.05$  was considered to be statistically significant. Stata 12.0 (StataCorp. College Station, Texas) was used to pool the effects and construct the plots.

## Results

### Study selection and methodological quality assessment (risk of bias)

A total of sixteen articles [17–32] involving 555 participants with PD were included in the systematic review. The flowchart of study selection was detailed in Fig 1. Random sequence allocation was sufficient in fifteen (94%) articles [17–28, 30–32]. Information on concealment of

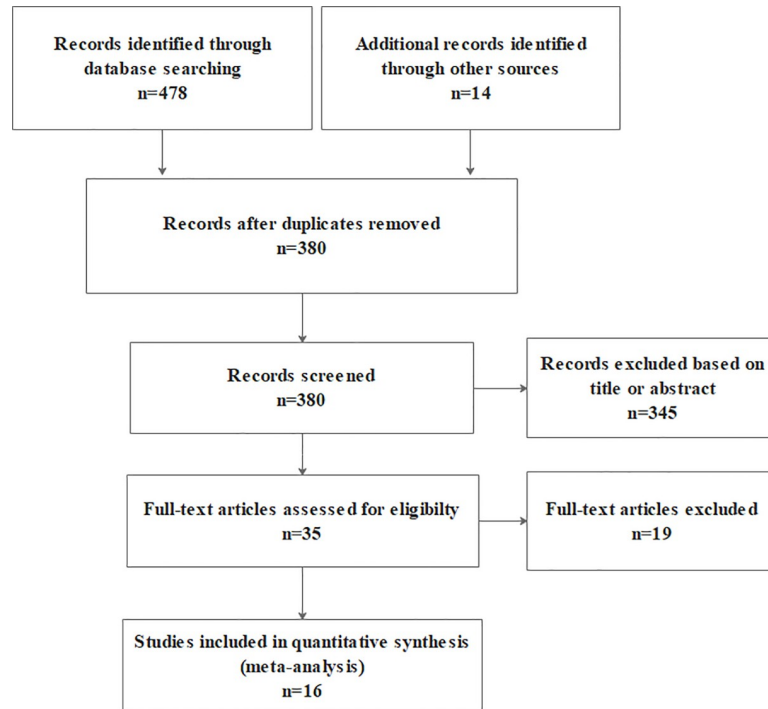

**Fig 1. Flowchart of trial selection.**

<https://doi.org/10.1371/journal.pone.0224819.g001>

treatment allocation was reported in fifteen (94%) articles [17–27, 29–32]. Eight (50%) trials [17, 18, 21, 25, 26, 28, 31, 32] reported adequate blinding of the outcome assessor. As mentioned above, due to the particularity of VR intervention, the blindness of participants and personnel did not apply, so we did not evaluate this item. Eleven (69%) articles [17, 18, 20–25, 27, 28, 32] clearly provided complete data, while there were high risk of attrition bias in two (12%) articles [29, 30]. There were thirteen (81%) articles [17–22, 24, 26, 28–32] was considered to be at unclear risk of bias about selective reporting. All articles included in our study were assessed with varying degrees of risks bias except van de Heuvel [25], which indicated that the overall quality of the articles included were at a medium level. The methodological quality of the included articles can be referred to in Table 1.

## Study design and population characteristics

16 There were references were finally included which and all were published from 2011 to 2018. All the experimental groups included in our study adopted VR-based interventions, such as balance training, sports games, visual feedback training and gait training. The intervening time ranged from 30 minutes to 1 hour, and the intervening period ranged from 4 to 12 weeks. While patients in the control group received either traditional or conventional rehabilitation training. Additional information about the interventions is available in Table 2.

## Results of primary outcomes

**Gait.** Three studies [17, 28, 29] involving 130 participants with PD reported the effects of VR technology on dynamic gait index (DGI). Low heterogeneity was observed ( $I^2 = 32\%$ ,  $P = 0.23$ ). Pooled SMD showed that There was no significant difference between two groups (SMD = -0.15, 95%CI = -0.50, 0.19,  $Z = 0.86$ ,  $P = 0.387$ , Fig 2). Seven studies [17, 19, 22, 25–28]

Table 1. Authors' judgments about each risk of bias item for each included study.

| Studies/Items      | Random sequence generation | Allocation concealment | Blinding of outcome assessment | Incomplete outcome data | Selective outcome reporting |
|--------------------|----------------------------|------------------------|--------------------------------|-------------------------|-----------------------------|
| Alves 2018         | Low                        | Low                    | Unclear                        | Unclear                 | Unclear                     |
| Chen 2017          | Low                        | Low                    | Unclear                        | Low                     | Unclear                     |
| Ferraz 2018        | Low                        | Low                    | Unclear                        | Low                     | Low                         |
| Gandolfi 2017      | Low                        | Unclear                | Low                            | Low                     | Unclear                     |
| van de Heuvel 2014 | Low                        | Low                    | Low                            | Low                     | Low                         |
| Laio 2014          | Low                        | Low                    | Unclear                        | Low                     | Unclear                     |
| Lee 2015           | Low                        | Low                    | Unclear                        | Low                     | Unclear                     |
| Lin 2016           | Unclear                    | Low                    | Unclear                        | High                    | Unclear                     |
| Özgönel 2016       | Low                        | Low                    | Unclear                        | Unclear                 | Unclear                     |
| Pedreira 2013      | Low                        | Low                    | Low                            | High                    | Unclear                     |
| Pompeu 2012        | Low                        | Low                    | Low                            | Low                     | Unclear                     |
| Ribas 2017         | Low                        | Low                    | Low                            | Low                     | Unclear                     |
| Shih 2016          | Low                        | Low                    | Unclear                        | Low                     | Low                         |
| Yang 2015          | Low                        | Low                    | Low                            | Low                     | Unclear                     |
| Shen 2014          | Low                        | Low                    | Low                            | Unclear                 | Unclear                     |
| Yen 2011           | Low                        | Low                    | Low                            | Low                     | Unclear                     |

<https://doi.org/10.1371/journal.pone.0224819.t001>

involving 347 participants with PD reported the effects of VR technology on gait speed. Low heterogeneity was observed ( $I^2 = 26.8\%$ ,  $P = 0.197$ ). Pooled SMD showed that there was no significant difference between two groups (SMD = 0.19, 95%CI = -0.03, 0.40,  $Z = 1.71$ ,  $P = 0.088$ , Fig 3). Four trials [19, 22, 25, 26] involving 166 participants with PD recorded the effects of VR technology on step and stride length, and there was no statistical heterogeneity was observed ( $I^2 = 0\%$ ,  $P = 0.682$ ). Pooled SMD showed that VR rehabilitation training had a significant effect on step and stride length (SMD = 0.72, 95%CI = 0.40, 1.04,  $Z = 4.38$ ,  $P < 0.01$ , Fig 4).

**Balance function.** Eleven studies [17, 18, 20, 21, 23–26, 28–30] involving 360 participants with PD provided complete data on balance function. Pooled SMD showed that VR rehabilitation training had a significant effect on balance function (SMD = 0.22, 95%CI = 0.01, 0.42,  $Z = 2.09$ ,  $P = 0.037$ , Fig 5). The meta-analysis showed low statistical heterogeneity ( $I^2 = 0\%$ ,  $P = 0.598$ ).

**Mobility.** Seven studies [17, 19, 20, 22, 23, 29, 30] involving 237 participants with PD evaluated the effect of VR on mobility through TUGT. The shorter the test time, the stronger the mobility. We chose the random effect model because there was a high heterogeneity was observed ( $I^2 = 60.1\%$ ,  $P = 0.001$ ), pooled effect analysis showed that VR rehabilitation training had a significant effect on mobility (MD = -1.95, 95%CI = -2.81, -1.08,  $Z = 4.41$ ,  $P < 0.01$ , Fig 6).

## Results of secondary outcomes

**Global motor function.** Five studies [17, 20, 21, 25, 30] involving 164 participants with PD reported the effects of VR technology on global motor function. We chose the random effect model to pool effects owing to a significant heterogeneity was observed ( $I^2 = 88.6\%$ ,  $P < 0.01$ ). There was no significant effect on global motor function between VR rehabilitation training and conventional training (SMD = -0.50, 95%CI = -1.48, 0.48,  $Z = 0.99$ ,  $P = 0.32$ , Fig 7).

**ADL.** Four studies [18, 21, 24, 29] involving 103 participants with PD reported the effects of VR technology on activities of daily life. Low heterogeneity was observed ( $I^2 = 23.7\%$ ,

Table 2. Main characteristics of included studies.

| study              | Age Gender (M/F)                    | Sample size | EG                                                                                | CG                                                                                              | Hoehn-Yahr scale                                                                  | Dosage                                        | Outcomes                       | Adverse events           |
|--------------------|-------------------------------------|-------------|-----------------------------------------------------------------------------------|-------------------------------------------------------------------------------------------------|-----------------------------------------------------------------------------------|-----------------------------------------------|--------------------------------|--------------------------|
| Pompeu 2012        | 67.4±8.1<br>17/15<br>53.1%/46.9%    | 32          | Wii-based motor training                                                          | Traditional balance exercise                                                                    | Stage 1 and 2                                                                     | 60 minutes/day<br>2 days/week<br>7 weeks      | BBS,UPDRS,MCA                  | Number of adverse events |
| Ribas 2017         | 60.95±9.11<br>8/12<br>40.0%/60.0%   | 20          | Nintendo Wii™ fit game                                                            | Traditional balance exercise                                                                    | EG:1.25 (1.0–2.0)<br>CG:1.5(1.0–2.0)                                              | 30 minutes/day<br>2 days/week<br>12 weeks     | BBS,ADL,6MWT                   | -                        |
| Shih 2016          | 68.15±9.58<br>16/4<br>80.0%/20.0%   | 20          | Balance-based exergaming game                                                     | Conventional balance training                                                                   | EG:1.6±0.84<br>CG <sub>1</sub> :1.4±0.52                                          | 50 minutes/day<br>2 days/week<br>8 weeks      | BBS,TUGT                       | -                        |
| Yang 2015          | 74.17±7.25<br>14/9<br>60.9%/39.1%   | 23          | Customized balance board therapy                                                  | Conventional balance training                                                                   | EG:3.0(3.0–3.0)<br>CG:3.0(3.0–3.0)                                                | 50 minutes/day<br>2 days/week<br>6 weeks      | BBS,TUGT,UPDRS,DGI, PDQ-39     | -                        |
| Alves 2018         | 61.07±10.74<br>25/2<br>92.6%/7.4%   | 27          | EG <sub>1</sub> :Nintendo Wii™ fit game<br>EG <sub>2</sub> :Xbox 360 motion games | Conventional balance training                                                                   | EG <sub>1</sub> :1.89±0.92<br>EG <sub>2</sub> :1.56±0.72<br>CG:1.78±0.83          | 45–60 minutes/day<br>3–5 days/week<br>5 weeks | TUGT,10MWT,BAI,DSF, WHOQOL-OLD | -                        |
| Chen 2017          | 63.37±5.7<br>26/20<br>56.5%/43.5%   | 46          | BioFlex-FP                                                                        | Conventional rehabilitation training                                                            | EG:2.57±0.50<br>CG <sub>1</sub> :2.52±0.51                                        | 50 minutes/day<br>5 days/week<br>6 weeks      | BBS, TUGT, CoP, HAMD, UPDRS    | -                        |
| Ferraz 2018        | 66.73±12.45<br>37/25<br>59.7%/40.3% | 62          | Xbox 360 game with Kinect                                                         | CG <sub>1</sub> :Conventional functional training<br>CG <sub>2</sub> :Bicycle exercise training | EG:2.5(2.5–3.0)<br>CG <sub>1</sub> :2.5(2.0–3.0)<br>CG <sub>2</sub> :2.5(2.0–2.5) | 50 minutes/day<br>3 days/week<br>8 weeks      | PDQ-39,6MWT,10MWT, GDS-15      | -                        |
| Gandolfi 2017      | 68.65±8.4<br>51/25<br>67.1%/32.9%   | 76          | TeleWii balance training                                                          | Conventional balance training                                                                   | EG:2.5(2.5–2.5)<br>CG:2.5(2.5–3.0)                                                | 50 minutes/day<br>3 days/week<br>7 weeks      | BBS,DGI,ABC,10MWT              | Number of falls          |
| van de Heuvel 2014 | 67.51±8.12<br>20/13<br>60.6%/39.4%  | 33          | Visual feedback training                                                          | Conventional balance training                                                                   | EG:2.5(2.0–3.0)<br>CG:2.5(2.0–2.5)                                                | 60 minutes/day<br>7days/week<br>5 weeks       | BBS,UPDRS,PDQ-39,FES           | Number of falls          |
| Laio 2014          | 65.67±7.39<br>17/19<br>47.2%/52.8%  | 36          | VR-based Wii Fit exercise                                                         | CG <sub>1</sub> :Fall-prevention education<br>CG <sub>2</sub> :Traditional balance exercise     | EG:2.0±0.7<br>CG <sub>1</sub> :1.9±0.8<br>CG <sub>2</sub> :2.0±0.8                | 45 minutes/day<br>2 days/week<br>6 weeks      | TUGT,PDQ-39,DBP,SOT, FES       | Number of adverse events |
| Lee 2015           | 69.25±3.15<br>10/10<br>50%/50%      | 20          | Nintendo Wii™ fit game                                                            | Conventional balance training                                                                   | -                                                                                 | 45 minutes/day<br>5 days/week<br>6 weeks      | BBS,ADL,BDI                    | -                        |

(Continued)

Table 2. (Continued)

| study          | Age Gender (M/F)                    | Sample size | EG                                            | CG                                  | Hoehn-Yahr scale                            | Dosage                                    | Outcomes                                | Adverse events           |
|----------------|-------------------------------------|-------------|-----------------------------------------------|-------------------------------------|---------------------------------------------|-------------------------------------------|-----------------------------------------|--------------------------|
| Lin 2016       | 61.72 ±7.29<br>22/11<br>66.7%/33.3% | 33          | Xbox 360 motion games                         | Conventional balance training       | EG:2.7±0.9<br>CG:2.9±0.7                    | 30 minutes/day<br>5 days/week<br>4 weeks  | BBS,TUGT,ADL                            | Number of adverse events |
| Özgönenel 2016 | 65 (46–78)<br>22/11<br>66.7%/33.3%  | 33          | Xbox video game console                       | Conventional rehabilitation program | Stage 1 = 7<br>Stage 2 = 16<br>Stage 3 = 10 | 60 minutes/day<br>3 days/week<br>5 weeks  | BBS,TUGT,UPDRS                          | -                        |
| Pedreira 2013  | 63.57 ±8.61<br>22/9<br>71.0%/29.0%  | 31          | Nintendo Wii™ fit game                        | Traditional balance exercise        | EG:2.5±0.6<br>CG <sub>1</sub> :2.4±0.7      | 40 minutes/day<br>3 days/week<br>4 weeks  | PDQ-39                                  | -                        |
| Yen 2011       | 70.3±6.6<br>24/4<br>85.7%/14.3%     | 28          | Customized balance board therapy              | Conventional balance training       | EG:2.6±0.5<br>CG <sub>1</sub> :2.4±0.5      | 30 minutes/day<br>2 days/week<br>12 weeks | SOT                                     | Number of falls          |
| Shen 2014      | 64.2±8.4<br>22/13<br>62.9%/37.1%    | 35          | Computerized Balance and gait training system | Conventional strength training      | EG:2.4±0.5<br>CG <sub>1</sub> :2.5±0.5      | 60 minutes/day<br>3 days/week<br>6 weeks  | ABC, Gait velocity, Stride length, MMSE | Number Of falls          |

M:Male; F:Female;EG:experimental group; CG: control group; TUGT: Timed Up and Go Test; BBS: Berg Balance Scale; ADL: Activities of Daily Living;PDQ-39:39-Question Parkinson's Disease Questionnaire; UPDRS: Unified Parkinson's Disease Rating Scale; DGI: Dynamic Gait Index WHOQOL-OLD: World Health Organization Quality of Life-Old; BAI: Beck Anxiety Index; BDI: Beck Depression Index; HAMD: Hamilton Depression Scale;GDS-15: 15-item Geriatric Depression Scale;6MWT & 10MWT:Six & Ten Minute Walk Test; MCA: Montreal Cognitive Assessment; MMSE: Mini-Mental State Examination; DSF:Digit Span forward; ABC: Activities-specific Balance Confidence Scale; FES: Falls Efficacy Scale; DBP:Dynamic Balance Performance; SOT:Sensory Organization Test; ABC:Activities-specific Balance Confidence Scale; CoP:Center of Pressure.

<https://doi.org/10.1371/journal.pone.0224819.t002>

$P = 0.269$ ). Pooled SMD presented that VR rehabilitation training had no significant effect on ADL (SMD = 0.25, 95%CI = -0.14, 0.64,  $Z = 1.24$ ,  $P = 0.216$ , Fig 8).

**Quality of life.** Six studies [17, 19, 22, 25, 27, 31] involving 248 participants with PD reported the effects of VR technology on the changes of patients' quality of life. Statistical

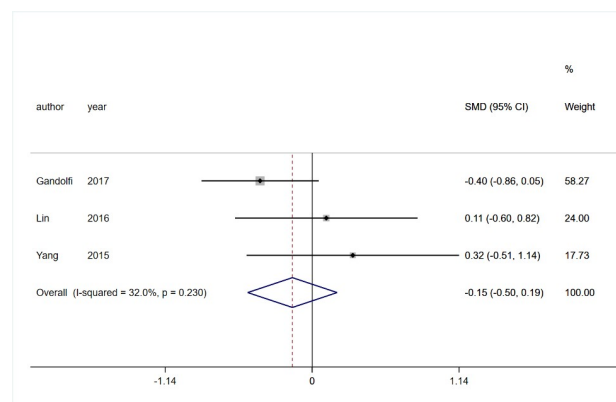

Fig 2. Forest plot of DGI.

<https://doi.org/10.1371/journal.pone.0224819.g002>



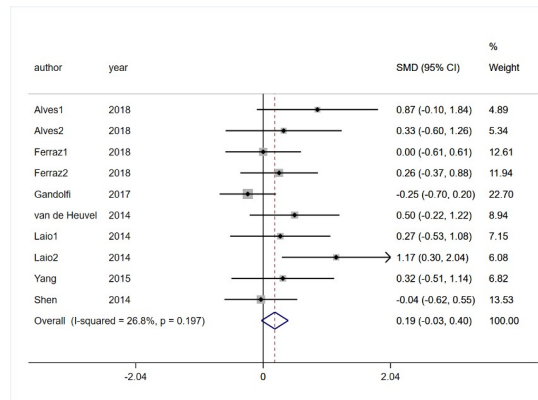

Fig 3. Forest plot of Gait speed.

<https://doi.org/10.1371/journal.pone.0224819.g003>

heterogeneity was very low ( $I^2 = 9.8\%$ ,  $P = 0.353$ ). Pooled SMD showed that VR rehabilitation training was better in improving the quality of life of patients with PD (SMD = -0.47, 95%CI = -0.73, -0.22,  $Z = 3.64$ ,  $P < 0.01$ , Fig 9).

**Perceived confidence in balance.** Three studies [22, 25, 26] involving 104 participants with PD reported the effects of VR technology on perceived confidence in balance. A significant heterogeneity was observed ( $I^2 = 70.4\%$ ,  $P = 0.018$ ). Pooled SMD presented that VR rehabilitation training had a significant effect on perceived confidence in balance than control group (SMD = -0.73, 95%CI = -1.43, -0.03,  $Z = 2.05$ ,  $P = 0.040$ , Fig 10).

**Neuropsychiatric symptoms.** Four studies [19, 20, 24, 27] involving 184 participants with PD reported the effect of VR on neuropsychiatric symptoms which were recorded by BAI, BDI and HAMD. There was a low statistical heterogeneity between studies ( $I^2 = 29.2\%$ ,  $P = 0.216$ ). Pooled SMD showed that VR rehabilitation training had a significant positive effect than control group (SMD = -0.96, 95%CI = -1.27, -0.65,  $Z = 6.07$ ,  $P < 0.01$ , Fig 11).

**Cognitive function.** Only two studies [19, 21] involving 68 participants with PD study provided complete data on cognitive function changes, and there was no significant difference in cognitive function between two groups (SMD = 0.21, 95%CI = -0.28, 0.69,  $Z = 0.84$ ,  $P = 0.399$ , Fig 12). Statistical heterogeneity remained low ( $I^2 = 40.6\%$ ,  $P = 0.185$ ).

**Adverse events.** Eight studies [21, 22, 24–26, 28, 29, 32] mentioned that adverse events occurred during the intervention would be observed. However, only one trial [29] reported

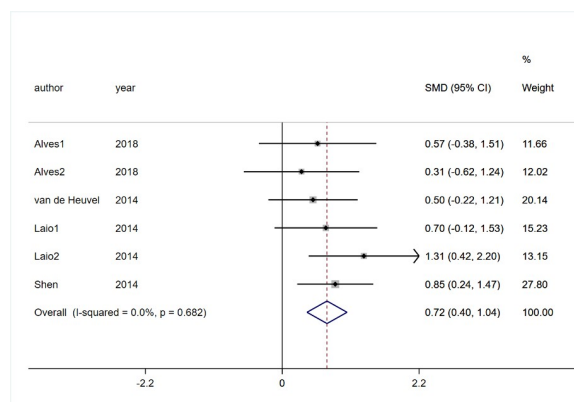

Fig 4. Forest plot of Step and stride length.

<https://doi.org/10.1371/journal.pone.0224819.g004>

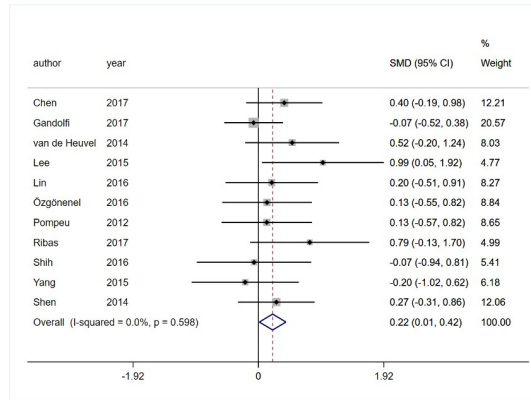

Fig 5. Forest plot of Balance function.

<https://doi.org/10.1371/journal.pone.0224819.g005>

that four patients developed mild dizziness and one patient developed severe dizziness and vomiting during the intervention.

### Publication bias

Finally, a funnel plot was constructed to identify any judge the publication bias. Since it included only the number of articles with balance function greater than 10 were included in the meta-analysis was greater than 10, we made funnel plot for it (Fig 13). The plot showed that the effects of each trial had relatively uniform distribution on both sides of the bottom. However due to the sample size of each article included in this research was small, and the rest of the outcomes were not suitable for making funnel plot, the existence of publication bias cannot be ruled out.

### Discussion

A total of 555 patients with PD in 16 studies were included in this systematic review. The results suggested that rehabilitation training based on VR technology is likely more effective than conventional training in improving PD patients' balance function mobility, step and stride length, quality of life and neuropsychiatric symptoms. Therefore, we believe that VR technology can at least be regarded as a rehabilitation therapy as effective as traditional

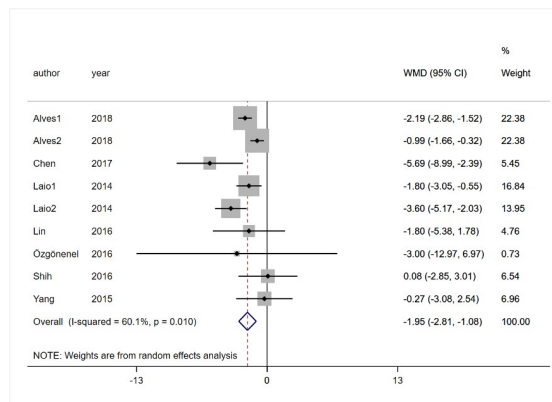

Fig 6. Forest plot of Mobility.

<https://doi.org/10.1371/journal.pone.0224819.g006>

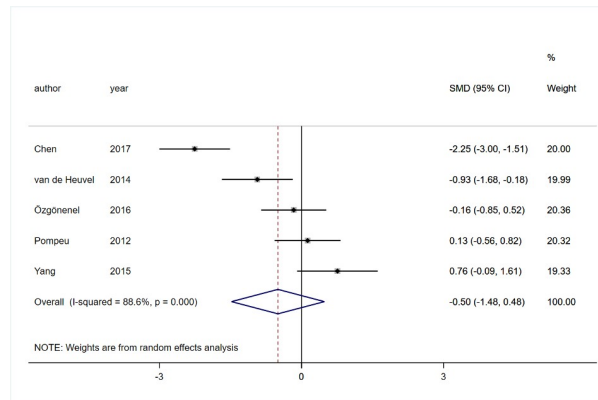

**Fig 7. Forest plot of Global motor function.**

<https://doi.org/10.1371/journal.pone.0224819.g007>

training, and to some extent better than it. However, the results of this study should be treated with caution due to differences in treatment intensity, intervention duration, and effect size among the included studies.

VR is a new technology emerging in recent years, which is rapidly gaining popularity as a PD treatment tool due to its novelty in training methods and its ability to provide personalized rehabilitation training [33]. Various professional technology platforms and treatment schemes based on VR are also under active development and research, and the number of researches on the application of VR in the field of neural rehabilitation is surging [34–36]. *Sampson et al.* found that the application of computer-based virtual robot training combined with functional electrical stimulation can improve the feasibility of arm movement in multiple patients and reduce the injury to the proximal arm, and patients have excellent compliance to intervention without side effects [37]. *Mahajan et al.* carried out relevant studies on driving operation training based on VR system, and found that this training method can effectively improve the position sensing ability of patients and can be an ideal choice for rehabilitation training of patients with tremor symptoms [38]. People with PD are unable to respond to changing conditions [39]. VR technology in PD is deepening, but the relevant conclusions are still controversial. Our systematic literature review findings are consistent with previous systematic reviews on stroke and Alzheimer's patients [40, 41], suggesting that VR intervention is superior to

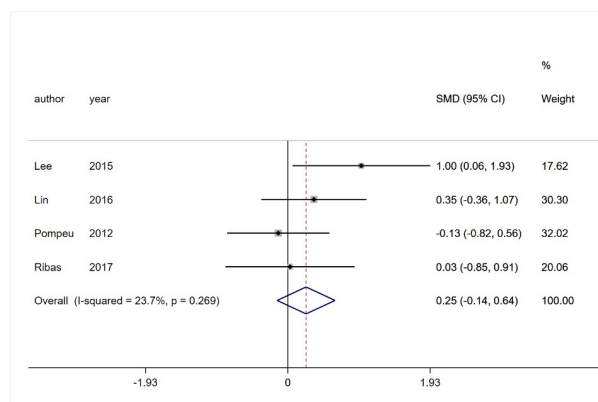

**Fig 8. Forest plot of ADL.**

<https://doi.org/10.1371/journal.pone.0224819.g008>

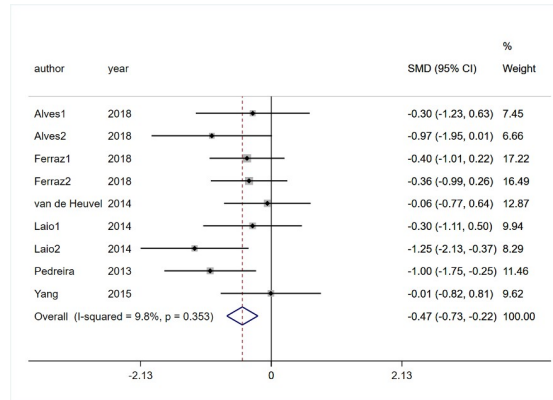

Fig 9. Forest plot of Quality of life.

<https://doi.org/10.1371/journal.pone.0224819.g009>

conventional rehabilitation training in improving the balance function and other indicators of the subjects.

Some included applied VR technology to balance training, dance training and other rehabilitation training, some studies used somatosensory game software to train patients, and some studies applied VR technology to rehabilitation training on the basis of routine exercise. The training time varied from 30 to 60 minutes for each session. In terms of training frequency, some studies conducted 2–3 times per week, while others conducted 5 times per week, and the total training time varied from 4 weeks to 12 weeks. In addition, VR technology equipment used in each study is not the same, and the conventional physical rehabilitation mode implemented by the control group in each study is not quite the same, which may be the reason for heterogeneity of results. Currently, there is no research that has shown which form of VR technology training or which treatment intensity has the best effect. It was pointed that PD patients have different tremor amplitude and rhythm patterns in different clinical stages (Hoehn-Yahr scale), which may be related to increased muscle tension and inactivity in patients with disease progression [42]. As the Hoehn-Yahr stage of patients included in each study was different, the intervention effect will be affected to some extent, which may be one of the reasons for the heterogeneity of our study results. In future studies, targeted interventions for patients of different stages can be developed to eliminate such heterogeneity.

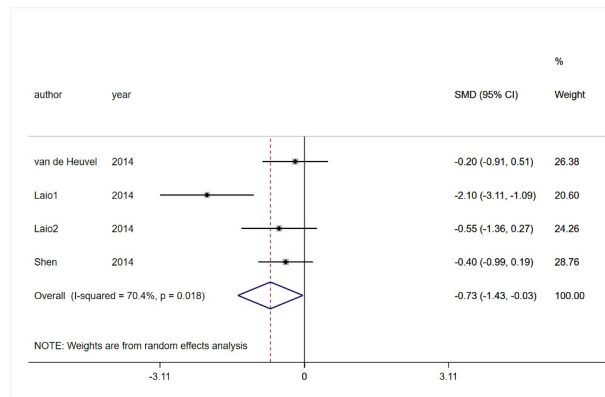

Fig 10. Forest plot of Perceived confidence in balance.

<https://doi.org/10.1371/journal.pone.0224819.g010>

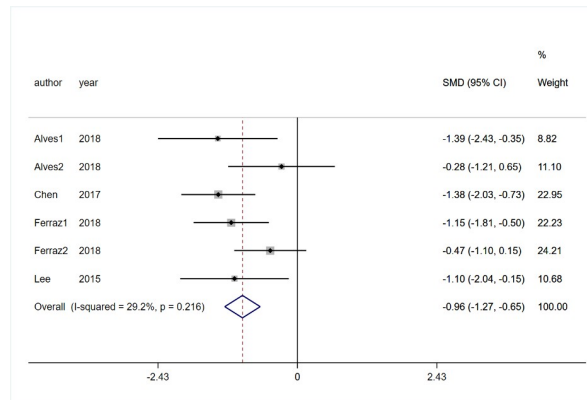

**Fig 11. Forest plot of Neuropsychiatric symptoms.**

<https://doi.org/10.1371/journal.pone.0224819.g011>

We analyzed VR's role in PD rehabilitation. Firstly, in the rehabilitation process, sports training based on VR technology can play a crucial role in improving the motor function of patients with nerve damage by reshaping the contra lateral sensor motor cortex. It can improve the ability of the brain to perceive, process and integrate information, so that patients can better maintain balance and control posture. Next, VR technology can generate instant feedback on a patient's audio-visual senses and proprioception, which enables patients to be placed in the environment through a variety of sensing devices, so as to improve the compliance of rehabilitation training and patients' enthusiasm [26]. Training tasks of different difficulty levels were set by accurately evaluating the functional level of the patients. When patients complete the training, they can not only feel the challenge but also reap the surprise of success, prompting them to continue the desire to "break the barrier", and finally achieve the purpose of improving the body function. Thirdly, active completion of assigned training tasks can enhance motor nerve plasticity and improve muscle control [43].

VR intervention means observed in the literature were diverse, but most of them are carried out in the form of immersive games. Such a training method enables patients to have a deeper interest and improve their subjective initiative, so as to actively complete various rehabilitation training, form a virtuous cycle to improve their functional level. Finally, the intervention in VR environment stimulated the subjects to generate autobiographical memory, improving their ability to recall familiar and unknown scenes [44]. Compared with traditional

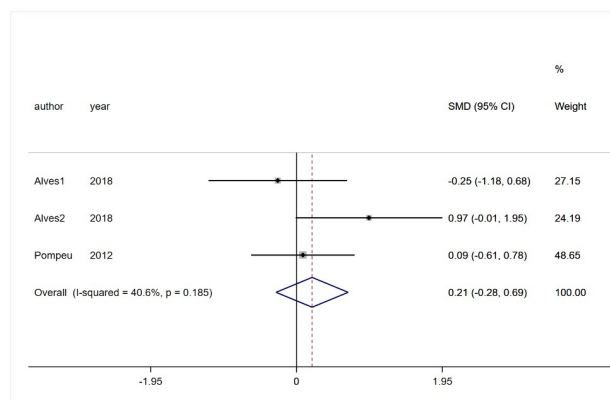

**Fig 12. Forest plot of Cognitive function.**

<https://doi.org/10.1371/journal.pone.0224819.g012>

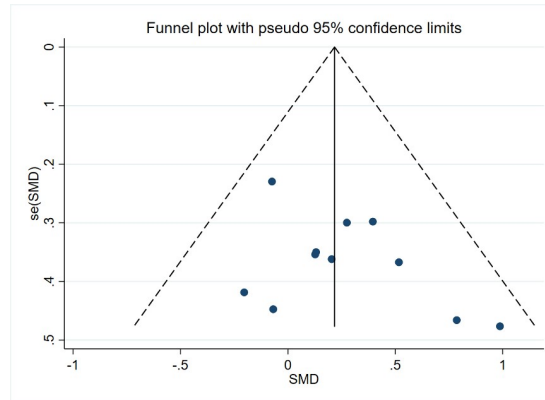

**Fig 13. Funnel plot.**

<https://doi.org/10.1371/journal.pone.0224819.g013>

rehabilitation training, VR technology has the advantage that it can precisely provide more individualized rehabilitation training programs according to the disease characteristics of different patients, and can upload the training data on the internet in real-time. It also promotes interaction between patients and the health system through the data synchronization between different devices, so as to improve the rehabilitation effect.

There were some limitations in this study that should be noted. Although a detailed literature search had been done, it has to be admitted that there is still the possibility of study omission, such as minority language or gray literature. Secondly, due to the particularity of VR technology interventions, the blind method cannot be applied to patients in the experimental group, which may lead to the deviation of subjective data reported by patients in the result evaluation. It is indeed difficult to implement double-blind method, but it is still the best design for randomized controlled studies. In addition, the VR intervention forms, training time and dosage, training intensity and outcome evaluation indexes adopted in the included studies are also different. Therefore, there is some heterogeneity in data collection, which is also the common limitation in other systematic evaluations of VR intervention. Finally, the cost of VR rehabilitation training was only reported in one article [28], and the economic benefits of this type of training have not been compared with the control group. In future studies, the cost of different type rehabilitation training should be used as an indicator for observation.

## Conclusions

Although our results support the conclusion that VR is likely to be a more effective means of rehabilitation for PD patients, more rigorously designed, standardized interventions and larger sample size multicenter randomized controlled trials are needed to provide a stronger evidence-based basis to verify the potential advantages of VR.

## Supporting information

### S1 Checklist.

(DOCX)

### S1 Appendix.

(DOCX)

## Acknowledgments

We would like to express our sincere thanks to all the medical staff of Neurology and Emergency department of People's Hospital of Deyang City.

## Author Contributions

**Conceptualization:** Cheng Lei, Yanfen Wang.

**Data curation:** Cheng Lei, Kejimu Sunzi, Baolu Zhang.

**Methodology:** Kejimu Sunzi, Fengling Dai, Mei Ju.

**Resources:** Lin He.

**Software:** Cheng Lei.

**Supervision:** Xiaoqin Liu, Mei Ju.

**Visualization:** Fengling Dai, Xiaoqin Liu, Mei Ju.

**Writing – original draft:** Cheng Lei.

**Writing – review & editing:** Cheng Lei, Mei Ju.

## References

1. Canning CG, Paul SS, Alice N. Prevention of falls in Parkinson's disease: a review of fall risk factors and the role of physical interventions. *Neurodegener Dis Manag.* 2014; 3: 203–221.
2. Jankovic J. Parkinson's disease: clinical features and diagnosis. *J Neurol Neurosurg Psychiatry.* 2008; 4: 368–376.
3. Nerius M, Fink A, Doblhammer G. Parkinson's disease in Germany: prevalence and incidence based on health claims data. *Acta Neurol Scand.* 2017; 5: 386–392.
4. Rizos A, Martinezmartin P, Odin P, Antonini A, Kessel B, Kozul TK, et al. Characterizing motor and non-motor aspects of early-morning off periods in Parkinson's disease: An international multicenter study. *Parkinsonism Relat Disord.* 2014; 11: 1231–1235.
5. Tomlinson CL, Patel S, Meek C, Clarke CE, Stowe R, Shah L, et al. Physiotherapy versus placebo or no intervention in Parkinson's disease. *Cochrane Database Syst Rev.* 2013; 9:CD002817
6. Fox SH, Regina K, Shen-Yang L, Bernard R, Klaus S, Miguel C, et al. The Movement Disorder Society Evidence-Based Medicine Review Update: Treatments for the motor symptoms of Parkinson's disease. *Mov Disord.* 2011; S3: S2–S41.
7. Baizabalcarvallo J F, Jankovic J. Movement disorders induced by deep brain stimulation. *Parkinsonism Relat Disord.* 2016; 25:1–9. <https://doi.org/10.1016/j.parkreldis.2016.01.014> PMID: 26806438
8. Corcos DM, Robichaud JA, David FJ, Leurgans SE, Vaillancourt DE, Cynthia P, et al. A two-year randomized controlled trial of progressive resistance exercise for Parkinson's disease. *Mov Disord.* 2013; 9: 1230–1240.
9. David FJ, Robichaud JA, Leurgans SE, Poon C, Kohrt WM, Goldman JG, et al. Exercise improves cognition in Parkinson's disease: The PRET-PD randomized, clinical trial. *Mov Disord.* 2015; 12: 1657–1663.
10. Beibei L, Qinneng D, Wusheng Z. Research progress on the role of virtual reality technology in rehabilitation of nervous system diseases. *Chin J Contemp Neurol Neurosurg.* 2018; 03: 222–225.
11. Gallagher R, Damodaran H, Werner WG, Powell W, Deutsch JE. Auditory and visual cueing modulate cycling speed of older adults and persons with Parkinson's disease in a Virtual Cycling (V-Cycle) system. *J Neuroeng Rehabil.* 2016; 1: 77.
12. Benito PAM, Ana RG, Ángel G, Alberto BS, Beatriz PA, Ana Isabel PAG. Application of virtual reality in the motor aspects of neurorehabilitation. *Rev Neurologia.* 2010; 8: 481–488.
13. Iruthayarajah J, Mcintyre A, Cotoi A, Macaluso S, Teasel R. The use of virtual reality for balance among individuals with chronic stroke: a systematic review and meta-analysis. *Top Stroke Rehabil.* 2016; 1: 68–79.

14. Donath L, Rössler R, Faude O. Effects of Virtual Reality Training (Exergaming) Compared to Alternative Exercise Training and Passive Control on Standing Balance and Functional Mobility in Healthy Community-Dwelling Seniors: A Meta-Analytical Review. *Sports Med.* 2016; 9: 1–17.
15. Xiaoxiao W, HongWei D, Hang L, AiHong W. Effects of Virtual Reality on Balance and Activities of Daily Living in Patients with Parkinson's Disease: A Meta-Analysis. *Chin J Rehabil Theory Pract.* 2017; 12: 1443–1449.
16. Dockx K, Bekkers EM, Van DBV, Ginis P, Rochester L, Hausdorff JM, et al. Virtual reality for rehabilitation in Parkinson's disease. *Cochrane Database Syst Rev.* 2013; 8: D10760.
17. Wenchieh Y, Hsingkuo W, Rueymeei W, Chienshun L, Kwanhwa L. Home-based virtual reality balance training and conventional balance training in Parkinson's disease: A randomized controlled trial. *J Formos Med Assoc.* 2016; 9: 734–743.
18. Ribas CG, Alves Da Silva L, Corrêa MR, Teive HG, Valderramas S. Effectiveness of exergaming in improving functional balance, fatigue and quality of life in Parkinson's disease: A pilot randomized controlled trial. *Parkinsonism Relat Disord.* 2017: 13–18.
19. Alves MLM, Mesquita BS, Morais WS, Leal JC, Satler CE, Dos Santos Mendes FA. Nintendo Wii™ Versus Xbox Kinect™ for Assisting People With Parkinson's Disease. *Percept Mot Skills.* 2018; 3: 546–565.
20. Si C, Jie L, Shun L, Kai W, Yugong H. Effects of Virtual Reality Rehabilitation on Balance for Patients with Parkinson's Disease. *Chin J Rehabil Theory Pract.* 2017; 09: 1091–1095.
21. Pompeu JE, Mendes FADS, Silva KGD, Lobo AM, Oliveira TDP, Zomignani AP, et al. Effect of Nintendo Wii™-based motor and cognitive training on activities of daily living in patients with Parkinson's disease: A randomised clinical trial. *Physiotherapy.* 2012; 3: 196–204.
22. Yingyi L, Yearu Y, Shihjung C, Yihru W, Jongling F, Rayyau W. Virtual Reality–Based Training to Improve Obstacle-Crossing Performance and Dynamic Balance in Patients With Parkinson's Disease. *Neurorehab Neural Re.* 2015; 7: 658–667.
23. Mengche S, Rayyau W, Shihjung C, Yearu Y. Effects of a balance-based exergaming intervention using the Kinect sensor on posture stability in individuals with Parkinson's disease: a single-blinded randomized controlled trial. *J Neuroeng Rehabil.* 2016; 1: 78.
24. Namyong L, Dongkyu L, Hyunseung S. Effect of virtual reality dance exercise on the balance, activities of daily living, and depressive disorder status of Parkinson's disease patients. *J Phys Ther Sci.* 2015; 1: 145–147.
25. van den Heuvel MC, Kwakkel G, Beek PJ, Berendse HW, Daffertshofer A, van Wegen EEH. Effects of augmented visual feedback during balance training in Parkinson's disease: A pilot randomized clinical trial. *Parkinsonism Relat Disord.* 2014; 12: 1352–1358.
26. Shen X, Mak MK. Balance and Gait Training With Augmented Feedback Improves Balance Confidence in People With Parkinson's Disease: A Randomized Controlled Trial. *Neurorehab Neural Repair.* 2014; 6: 524–535.
27. Ferraz DD, Trippo KV, Duarte GP, Neto MG, Bernardes Santos KO, Filho JO. The Effects of Functional Training, Bicycle Exercise, and Exergaming on Walking Capacity of Elderly Patients With Parkinson Disease: A Pilot Randomized Controlled Single-blinded Trial. *Arch Phys Med Rehabil.* 2018; 5: 826–833.
28. Gandolfi M, Geroi C, Dimitrova E, Boldrini P, Waldner A, Bonadiman S, et al. Virtual Reality Telerehabilitation for Postural Instability in Parkinson's Disease: A Multicenter, Single-Blind, Randomized, Controlled Trial. *Biomed Res Int.* 2017: 1–11.
29. Zhicheng L, Azheng C, Yijing J, Dengzhong C, Xiaoqian Y, Yongmei Y. Effects of Virtual Reality Balance Game on Balance Function for Parkinson's Disease. *Chin J Rehabil Theory Pract.* 2016; 09: 1059–1063.
30. Özgönenel L, Cagirici S, Cabalar M, Durmusoglu G. Use of Game Console for Rehabilitation of Parkinson's Disease. *Balk Med J.* 2016; 4: 396–400.
31. Pedreira G, Prazeres A, Cruz D, Gomes I, Monteiro L, Melo A. Virtual games and quality of life in Parkinson's disease: A randomised controlled trial. *Adv Parkinson's Dis.* 2013; 04: 97–101.
32. Changyi Y, Kwanhwa L, Minghsia H, Rueymeei W, Tungwu L, Chiahwa L. Effects of virtual reality-augmented balance training on sensory organization and attentional demand for postural control in people with Parkinson disease: a randomized controlled trial. *Phys Ther.* 2011; 6: 862–874.
33. Pan X, Hamilton A. Why and how to use virtual reality to study human social interaction: The challenges of exploring a new research landscape. *Br J Psychol.* 2018; 3: 395–417.
34. Feng Z, Gonzalez V, Amor R, Lovreglio R, Cabrera G. Immersive Virtual Reality Serious Games for Evacuation Training and Research: A Systematic Literature Review. *Comput Educ.* 2018: 252–266.



35. Freeman D, Haselton P, Freeman J, Spanlang B, Kishore S, Albery E, et al. Automated psychological therapy using immersive virtual reality for treatment of fear of heights: a single-blind, parallel-group, randomised controlled trial. *Lancet Psychiat*. 2018; 8: 625–632.
36. Reger GM, Smolenski D, Norr A, Katz A, Buck B, Rothbaum BO. Does Virtual Reality Increase Emotional Engagement During Exposure for PTSD? Subjective Distress During Prolonged and Virtual Reality Exposure Therapy. *J Anxiety Disord*. 2019; 1: 75–81.
37. Sampson P, Freeman C, Coote S, Demain S, Feys P, Meadmore K, et al. Using Functional Electrical Stimulation Mediated by Iterative Learning Control and Robotics to Improve Arm Movement for People With Multiple Sclerosis. *IEEE Trans Neural Syst Rehabil Eng*. 2015; 99: 235–248.
38. Mahajan HP, Spaeth DM, Dicianno BE, Brown K, Cooper RA. Preliminary evaluation of variable compliance joystick for people with multiple sclerosis. *J Rehabil Res Dev*. 2014; 6: 951–962.
39. Darya Y, Gago MF, Estela B, Vitor F, Gago NF, Luis C, et al. Compensatory postural adjustments in Parkinson's disease assessed via a virtual reality environment. *Behav Brain Res*. 2016: 384–392.
40. Zhen L, Xiuguo H, Jing S, Shaojun M. Virtual reality for improving balance in patients after stroke: A systematic review and meta-analysis. *Clin Rehabil*. 2016; 5: 432–440.
41. Coyle H, Traynor V, Solowij N. Computerized and Virtual Reality Cognitive Training for Individuals at High Risk of Cognitive Decline: Systematic Review of the Literature. *Am J Geriatr Psychiatry*. 2015; 4: 335–359.
42. Ying W, Hua P, Fan J, Na C, Lei Z, Shuo Y. Analysis of tremor characteristics in patients with Parkinson's disease in different stages. *Chin J Neuroimmunol & Neurol*, 2017; 1:25–28 <https://doi.org/10.1016/j.jneuroim.2014.04.012>
43. Rose T, Chang SN, Chen KB. Immersion of virtual reality for rehabilitation—Review. *Appl Ergon*. 2018; 5:153–161.
44. Benoit M, Guerchouche R, Petit PD, Chapoulie E, Manera V, Chaurasia G, et al. Is it possible to use highly realistic virtual reality in the elderly? A feasibility study with image-based rendering. *Neuropsych Dis Treat*. 2015; 3: 557–563.
